# Supplementary material for: Comparing Current and Next-Generation Humanized Mouse Models for Advancing HIV and HIV/Mtb Co-Infection Studies
Source: MDPI journal article supplement (doi:10.3390/v14091927), 2022-08-30
Supplement: s1 [file s1]

## **Supplementary Materials**

### **METHODS:**

#### *Generation of NRG-A2 mice:*

One male NSG-A2 mouse (stock ID# 009617, obtained from Jackson laboratories) was paired with a female NRG mouse (stock ID# 007799). From each offspring, a small piece of the tail was collected, DNA was extracted and *Rag* and HLA-A2 genotyping was done by PCR. After 12 generations of back-crossing with NRGs, the mice lacking the *Rag* allele and positive for HLA-A2 were maintained as a homozygous NRG-A2 colony.

#### *Mouse Genotyping:*

For *Rag* and *Scid* genotyping, Platinum Taq DNA Polymerase (Invitrogen) and the following primer sequences were used: *Rag* Forward primer: 5'-GAGGTTCCGCTACGACTCTG-3', *Scid* Forward primer: 5'-TGGATGTGGAATGTGTGCGAG-3', and a common primer (Forward primer: 5'-CCGGACAAGTTTTTCATCGT-3').

To confirm the presence of the HLA-A2 allele (A\*02:01), PCR genotyping was performed using the MyTaq HS Red Mix (Bioline) and the following primer sequences: Forward primer: 5'-TTCTCCCTCTCCCAACCTATGTAG-3'; Reverse primer: 5'-CGACGACACTGATTGGCTTCT-3'.

To confirm the presence of the DRAG allele (DRB1\*04:01), PCR genotyping was performed using the Platinum II Hot-Start PCR Master Mix (Invitrogen) and the following primer sequences were used: Forward primer: 5'-GTTTCTTGAGCAGGTTAAAC-3'; Reverse primer: 5'-CTGCACTGTGAAGCTCTCAC-3'; Forward internal control: 5'-CAAATGTTGCTTGTCTGGTG-3'; Reverse internal control: 5'-GTCAGTCGAGTGCACAGTTT-3'.

#### *Flow cytometry antibodies:*

**Supplementary Table S1:** Flow cytometry antibodies used to characterize immune cell populations.

| <b>Marker</b>         | <b>Clone</b> | <b>Colour</b>   | <b>Concentration</b> | <b>Manufacturer</b> |
|-----------------------|--------------|-----------------|----------------------|---------------------|
| Fixable viability dye | -            | APC-eFluor 780  | 1 uL/mL              | eBiosciences        |
| mCD45                 | 30-F11       | Alexa Fluor 700 | 0.004 ug/mL          | eBiosciences        |
| hCD45                 | H130         | Pacific Blue    | 0.01 ug/mL           | eBiosciences        |
| hCD3e                 | UCHT1        | Qdot605         | 0.01 uM              | eBiosciences        |
| hCD4                  | RPA-T4       | PerCP-Cy5.5     | 1.25 ug/mL           | eBiosciences        |
| hCD8a                 | RPA-T8       | PE-Cy7          | 1.25 ug/mL           | eBiosciences        |
| hCD19                 | HIB19        | PE              | 2.5 ug/mL            | eBiosciences        |
| hCD14                 | Tuk4         | Alexa Fluor 647 | 0.01 ug/mL           | eBiosciences        |
| hCCR5                 | 2D7          | FITC            | 2 ug/mL              | BD Biosciences      |
| hCD11b                | CBRM1/5      | PerCP-Cy5.5     | 0.01 ug/mL           | BioLegend           |
| hCD14                 | M2E2         | BV785           | 0.004 ug/mL          | BioLegend           |
| hCD206                | 7-239        | APC             | 0.02 ug/mL           | BioLegend           |
| hCD169                | 15-2         | PE              | 0.001 ug/mL          | BioLegend           |
| hCD16                 | 3G8          | FITC            | 0.01 ug/mL           | BioLegend           |

### *Immunohistochemistry:*

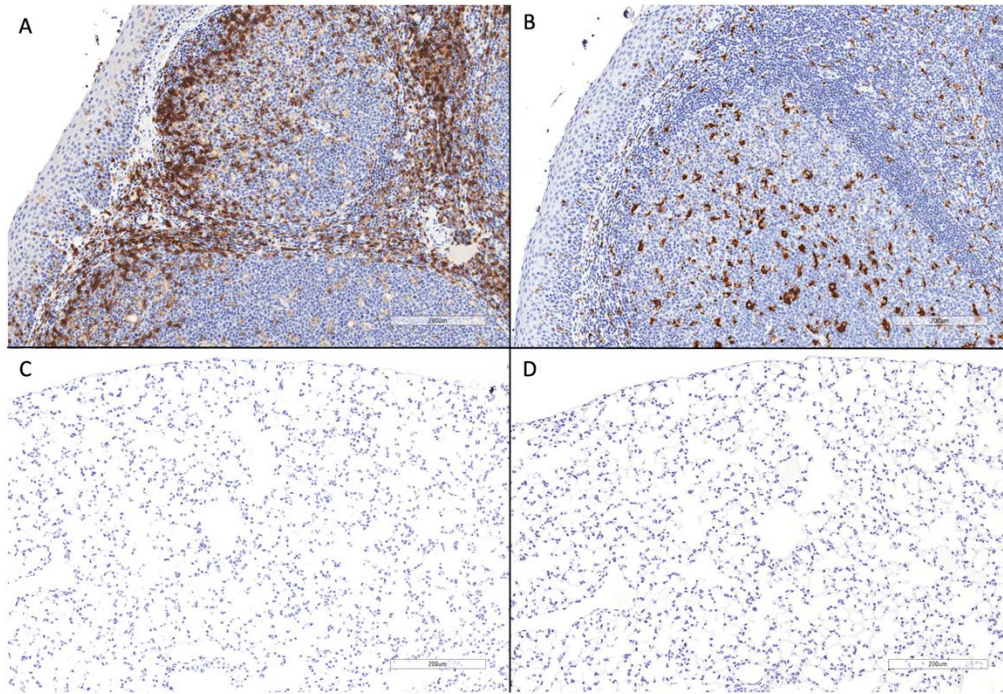

**Supplementary Figure S1.** *Immunohistochemistry positive and negative controls.* Top: Human tonsil (A) hCD4+ and (B) hCD68+ IHC positive controls. Bottom: Non-humanized NRG mouse lung (C) hCD4+ and (D) hCD68+ IHC negative controls (all 20x, scale bar = 200µm).

### **RESULTS:**

**Supplementary Table S2.** Cord blood samples used for humanizing NRG and DRAG-A2 mice.

| Cord blood sample # | HLA type | Mouse strain engrafted | Engraftment Method | Success rate  |
|---------------------|----------|------------------------|--------------------|---------------|
| 1                   | DR4+A2+  | DRAG-A2                | IH, newborn        | 6/6 (100%)    |
| 2                   | DR4-     | NRG                    | IH, newborn        | 9/9 (100%)    |
| 3                   | DR4-     | NRG                    | IH, newborn        | 9/9 (100%)    |
| 4                   | DR4-     | NRG                    | IH, newborn        | 3/7 (42.8%)   |
| 5                   | DR4-     | NRG                    | IH, newborn        | 6/7 (85.7%)   |
| 6                   | DR4+A2+  | DRAG-A2                | IV, adult          | 10/21 (47.6%) |
| 7                   | DR4-     | NRG                    | IH, newborn        | 11/12 (91.7%) |
| 8                   | DR4+A2+  | DRAG-A2                | IH, newborn        | 6/9 (66.7%)   |
| 9                   | DR4+A2+  | DRAG-A2                | IH, newborn        | 9/11 (81.8%)  |

|    |      |     |             |             |
|----|------|-----|-------------|-------------|
| 10 | DR4- | NRG | IH, newborn | 7/7 (100%)  |
| 11 | DR4- | NRG | IH, newborn | 9/9 (100%)  |
| 12 | DR4- | NRG | IH, newborn | 5/8 (62.5%) |

**Supplementary Table S3:** Baseline pre-infection human immune cell reconstitution in the blood of humanized mice used for HIV infection.

| Mouse # | Sample # | Strain    | %hCD45+ of Total Leuk | #hCD45+ / mL | %hCD3+ / hCD45+ | #hCD3+ / mL | %hCD4+ / hCD3+ | #hCD4+ / mL |
|---------|----------|-----------|-----------------------|--------------|-----------------|-------------|----------------|-------------|
| 1       | 1        | huDRAG-A2 | 79.56                 | 449,300      | 26.5            | 119,065     | 55.1           | 65,605      |
| 2       | 1        | huDRAG-A2 | 62.82                 | 272,901      | 25.0            | 68,225      | 57.4           | 39,161      |
| 3       | 6        | huDRAG-A2 | 21.3                  | 75,280       | 68.1            | 51,240      | 60.5           | 31,000      |
| 4       | 2        | huNRG     | 55.45                 | 294,968      | 33.0            | 97,339      | 44.4           | 43,219      |
| 5       | 2        | huNRG     | 71.11                 | 237,307      | 38.7            | 91,838      | 55.0           | 50,511      |
| 6       | 7        | huNRG     | 12.51                 | 106,400      | 28.2            | 30,005      | 36.7           | 11,012      |
| 7       | 7        | huNRG     | 19.22                 | 81,200       | 72.5            | 58,870      | 53.3           | 31,378      |
| 8       | 7        | huNRG     | 23.14                 | 56,800       | 67.6            | 38,397      | 37.5           | 14,399      |

**Supplementary Table S4:** Baseline pre-infection human immune cell reconstitution in the blood of humanized mice used for *Mtb* infection.

| Mouse # | Sample # | Strain    | %hCD45+ of Total Leuk | #hCD45+ / mL | %hCD3+ / hCD45+ | #hCD3+ / mL | %hCD4+ / hCD3+ | #hCD4+ / mL | %hCD8+ / hCD3+ | #hCD8+ / mL | %hCD14+ / hCD45+ | #hCD14+ / mL |
|---------|----------|-----------|-----------------------|--------------|-----------------|-------------|----------------|-------------|----------------|-------------|------------------|--------------|
| 9       | 1        | huDRAG-A2 | 65.65                 | 87,224       | 68.4            | 59,662      | 77.7           | 46,357      | 16.8           | 10,023      | 2.06             | 1,797        |
| 10      | 1        | huDRAG-A2 | 48.50                 | 106,400      | 27.6            | 29,366      | 65.0           | 19,088      | 17.9           | 5,257       | 13               | 13,832       |
| 11      | 1        | huDRAG-A2 | 34.23                 | 110,800      | 52.4            | 58,059      | 68.7           | 39,887      | 22             | 12,773      | 6.34             | 7,025        |
| 12      | 3        | huNRG     | 29.70                 | 127,660      | 21.3            | 27,192      | 51.9           | 14,112      | 9.64           | 2,621       | 6.2              | 7,915        |
| 13      | 3        | huNRG     | 19.97                 | 196,940      | 20.0            | 39,388      | 51.9           | 20,442      | 8.49           | 3,344       | 3.58             | 7,050        |
| 14      | 10       | huNRG     | 35.45                 | 57,320       | 50.9            | 29,176      | 59.7           | 17,418      | 31.9           | 9,307       | -                | -            |

|    |    |       |       |         |      |        |      |        |      |        |      |       |
|----|----|-------|-------|---------|------|--------|------|--------|------|--------|------|-------|
| 15 | 11 | huNRG | 6.39  | 38,280  | 96.8 | 37,055 | 76.8 | 28,458 | 20.3 | 7,522  | -    | -     |
| 16 | 12 | huNRG | 12.83 | 118,880 | 32.4 | 38,517 | 55.3 | 21,300 | 30.3 | 11,671 | 2.15 | 2,556 |
| 17 | 12 | huNRG | 22.73 | 108,400 | 66.4 | 71,978 | 59.3 | 42,683 | 35.9 | 25,840 | 2.83 | 3,068 |

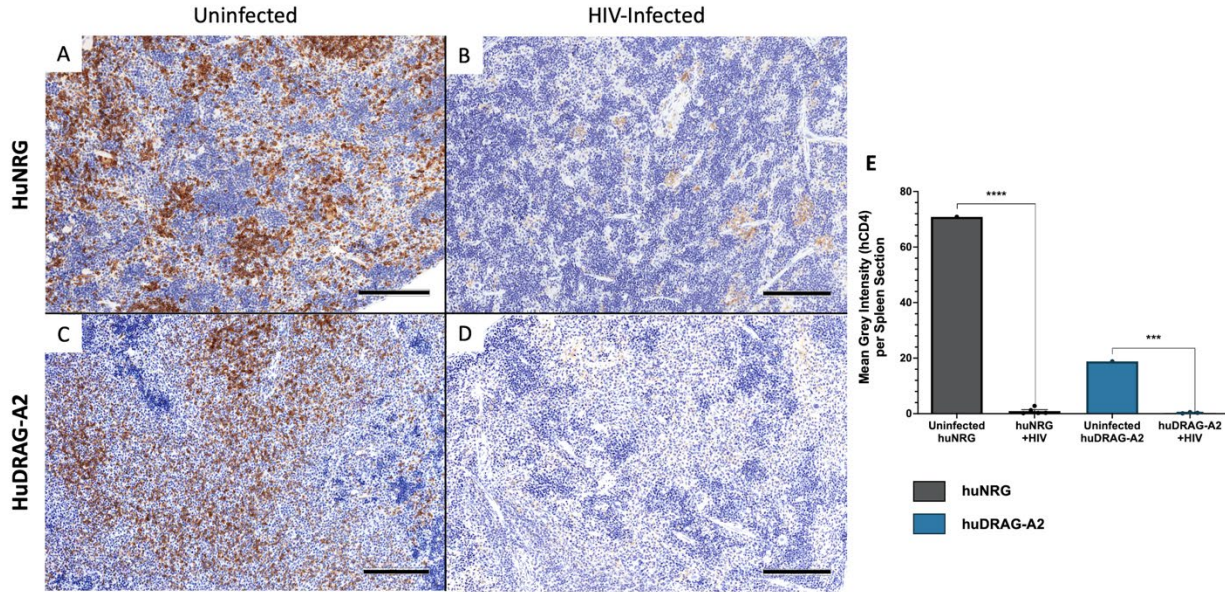

**Supplementary Figure S2.** Human CD4<sup>+</sup> T cells are depleted in the spleen of huNRG and huDRAG-A2 mice at 8 weeks post-infection, indicating viral dissemination. (A) Uninfected and (B) HIV-infected huNRG lung stained for human CD4<sup>+</sup> by IHC at 8 weeks post-infection (observed in N = 5). (C) Uninfected and (D) HIV-infected huDRAG-A2 lung stained for human CD4<sup>+</sup> by IHC at 8 weeks post-infection (observed in N = 3). (E) Quantification of human CD4<sup>+</sup> depletion in the spleen tissue of uninfected huNRG and huDRAG-A2 mice (N=1 each), and HIV-infected huNRG (N=5) and huDRAG-A2 (N=3) mice. Human CD4<sup>+</sup> T cells are stained brown. Data are expressed as mean +/- SEM, p value = \*\*\* <0.001, \*\*\*\* <0.0001. (All images at 10x, scale bar = 200  $\mu$ m).

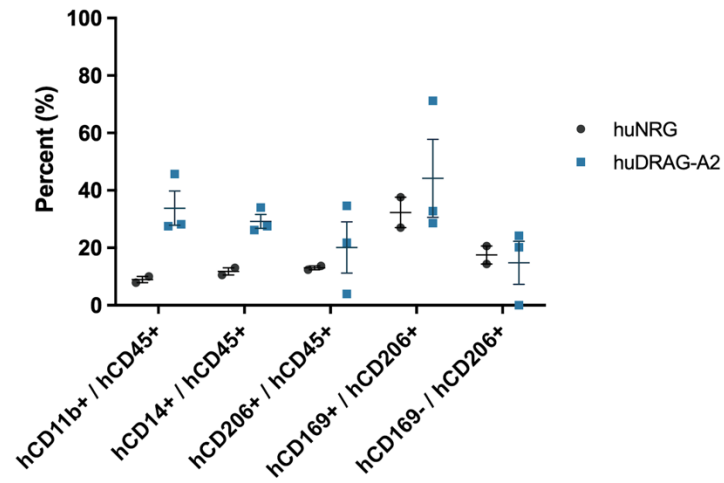

**Supplementary Figure S3.** *Human macrophage subsets in huNRG and huDRAG-A2 Lungs.*

Various subsets of human macrophages were identified in the lungs of huNRG (N = 2) and huDRAG-A2 (N = 3) mice at 4 weeks post-TB infection. Data are expressed as mean +/- SEM.

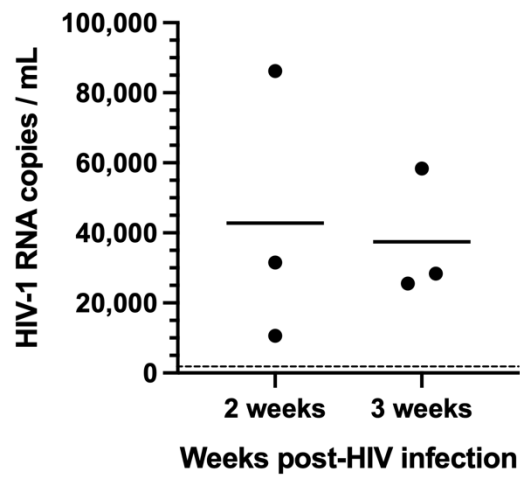

**Supplementary Figure S4.** *HIV viral load in the blood plasma of HIV-infected mice prior to co-infection with Mtb.* Successful HIV-1 infection was sustained in the blood plasma of huNRG mice at 2 and 3 weeks post-HIV infection (N = 3). Solid lines indicate means, dotted line indicates assay detection threshold at 1,500 RNA copies/mL.

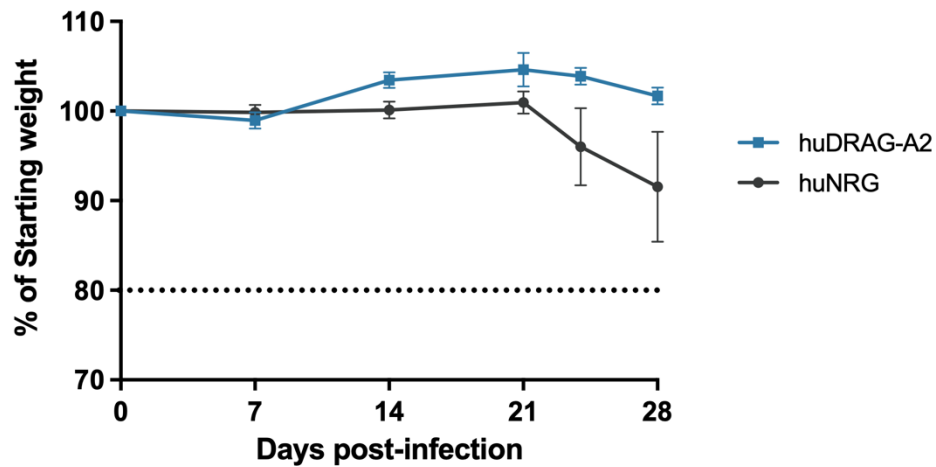

**Supplementary Figure S5.** *There was no significant difference in the survival of huNRG (N = 6) and huDRAG-A2 (N = 3) mice up to 4 weeks post-infection with H37Rv Mtb. Dashed line indicates pre-determined humane 20% weight loss endpoint. Data are expressed as mean +/- SEM.*
